# Supplementary material for: Outcomes and prognoses of patients with ovarian cancer using bevacizumab: 6-year experience in a tertiary care hospital of northern Taiwan
Source: PLoS One. 2017 May 3;12(5):e0175703. doi: 10.1371/journal.pone.0175703 (PMC5415172; doi:10.1371/journal.pone.0175703)
Supplement: S1 Table — (XLSX) [file pone.0175703.s001.xlsx]

## Sheet: 工作表4
計算欄位
求解順序	欄位	公式
計算項目
求解順序	項目	公式
備註:	當有多個公式更新一個儲存格時，
	儲存格的值是由求解順序最後的公式來決定。
	若要變更公式求解順序，
	請使用樞紐分析表指令列上的 [求解順序] 指令。

## Sheet: Original
Number	age	Stage	Primary site	Cell type	grade	Ascites	Progression free survival	Overall survival	1st treatment	later treatment 1	later treatment2	later treatment 3	1st treatment dose	2nd chemotherapy dose	3rd chemotherapy	4th chemotherapy	other chemotherapy	Platinum free interval	other treatment	how many lines	Avastin use	Avastin use-1	Avastin use-2	Avastin use-3	Avastin use-4	Avastin use -5	Arterial thromboenbolic	CNS bleeding	Venous thromboenbolic event	Non CNS bleeding	other cardiac	CHF	leukopenia	Thrombocytopenia	Febrile neutropenia	Anemia	Wound healing complications	Proteinuria	Hypertension	GI perforation	Fistula/abscess
1	76	2	Tube	Clear		None	1114	2245	Paclitaxel and Platinum	Experimental chemotherapy	Experimental chemotherapy	Experimental chemotherapy	T135+P75	Irinotecan 60	Oxaliplatin 80	5-FU 750	Lipodox, 5-FU	1		3	Avastin 5mg/kg; 5mg/kg + 5-FU 750mg/m2 x2	Avastin 5mg/kg	5-FU 750mg/m2 x2				Nil	Nil	Nil	Nil	Nil	Nil	Nil	Grade1			Nil	Nil	Nil	Nil	Nil
2	68	3	Ovary	Poorly-differentiated		Yes	30	103	Paclitaxel and Platinum				T135 + P75				Carbo AUC 4 + Lipodox 35; IP chemo with Cisplatin 60	3	No	3	Avastin 5mg/kg + 5-FU 750 x3	Avastin 5mg/kg	5-FU 750 x3				Nil	Nil	Nil	Nil	Nil	Nil	Nil	Nil	Nil	Grade1	Nil	Nil	Nil	Nil	Nil
3	51	4	Ovary	Serous	3	None	136	257	Paclitaxel and Platinum	Experimental chemotherapy	Avastin	Experimental chemotherapy	Carbo 6 + DD-T70	Carbo 4 + cyclophosphamide 600	IP Avastin 5mg/kg	IP Etoposide 80; IP 5-FU 1000	Carbo 4 + Lipodox 40; Avastin 5 + Topotecan 3; Carbo 4 + Topotecan 0.75; Lipo-dox 15 + Gemcitabine 600	1	Avastin	4	Avastin 5mg/kg + 5-FU 750 x3	Avastin 5mg/kg	5-FU 750 x3				Nil	Nil	Nil	Nil	Nil	Nil	Nil	Grade1	Nil	Grade1	Nil	Nil	Nil	Nil	Nil
4	54	4	Ovary	Serous	3	Yes	103	359	Paclitaxel and Platinum	Experimental chemotherapy	Experimental chemotherapy		P75 + T135	Intrapleural-Cisplatin 50; Bleomycin 60	Paclitaxel 80		Carbo + Lipodox; Topotecan; Carbo + Paclitaxel	1	No	4	Avastin 5mg/kg + 5-FU 750 x5	Avastin 5mg/kg	5-FU 750 x5				Nil	Nil	Nil	Nil	Nil	Nil	Grade1	Nil	Nil	Grade1	Nil	Nil	Nil	Nil	Nil
5	73	4	Ovary	Serous	3	Yes	13	489	Paclitaxel and Platinum	Experimental chemotherapy	Experimental chemotherapy	Experimental chemotherapy	Carbo 5 + T 175	Carbo 4 + Topo 4	IP Cisplatin 75; IP Avastin	IV Carbo + Etoposide; IV Avastin + Lipodox; IP Avastin + 5-FU	Carbo + Lipodox; Carbo + Topo	1	No	3	Avastin 5mg/kg + 5-FU 750 x4	Avastin 5mg/kg	5-FU 750 x4				Nil	Nil	Nil	Grade2	Nil	Nil	Grade1	Grade1	Nil	Nil	Nil	Nil	Nil	Nil	Nil
6	41	2	Ovary	Mucinous		None	7	25	Paclitaxel and Platinum				Cisplatin 75 + T 135				Cisplatin 40; Carbo + Lipodox; Oxaliplatin + Capecitabine; Carbo + Topotecan; Paclitaxel + Gemcitabine; Irinotecan + Etoposide; Irinotecan + Mitomycin C	8	Radiotherapy	8	Avastin 5mg/kg + Lipodox 10 x1	Avastin 5mg/kg	Lipodox 10 x1				Nil	Nil	Nil	Grade1	Nil	Nil	Nil	Grade1	Nil	Grade1	Nil	Nil	Nil	Nil	Nil
7	56	4	Ovary	Serous	3	Yes	50	441	Paclitaxel and Platinum	Experimental chemotherapy Avastin	Experimental chemotherapy	Avastin	Cisplatin 75 + T 175	IP Etoposide; IV Avastin + Etoposide	Carbo + Etoposide	IP Avastin	IP Cisplatin 60; IP Etoposide 70	17	No	3	Avastin 2mg/kg + Lipodox 10 x 2	Avastin 2mg/kg	Lipodox 10 x 2				Nil	Nil	Nil	Nil	Nil	Nil	Grade1	Grade1	Nil	Grade1	Nil	Nil	Nil	Nil	Nil
8	65	3	Ovary	Endometrioid		None	234	234	Paclitaxel and Platinum				Carbo 5 + T 175				Carbo + Topo	34			Avastin 2mg/kg + Lipodox 15	Avastin 2mg/kg	Lipodox 15				Nil	Nil	Nil	Nil	Grade5	Grade4	Grade1	Nil	Nil	Grade1	Nil	Nil	Nil	Nil	Nil
9	73	4	Ovary	Poorly-differentiated		None	24	24	Paclitaxel and Platinum				Cisplatin 75 + T175				Carbo + Lipodox; IV Paclitaxel	26	Radiotherapy	3	Avastin 2 mg/kg + Lipodox 10	Avastin 2 mg/kg	Lipodox 10				Nil	Nil	Nil	Grade1			Nil	Grade1	Nil	Grade1	Nil	Nil	Nil	Nil	Nil
10	38	1	Ovary	Endometrioid	2	None	432	1247	Paclitaxel and Platinum	Experimental chemotherapy	Experimental chemotherapy	Experimental chemotherapy	Cisplatin 75 + T175	Carbo + Topo	Adriamycin + Ifosfamide	Carbo + Ifosfamide	No	41	No	1	Carboplatin 4 + Lipodox 40 + Avastin 5mg/kg	Avastin 5mg/kg	Carboplatin 4	Lipodox 40			Nil	Nil	Nil	Nil	Nil	Nil	Grade1	Nil	Nil	Grade1	Nil	Nil	Nil	Nil	Nil
11	71	4	Peritoneal	Serous	3	Yes	391	427	Paclitaxel and Platinum Avastin				Carboplatin 5 + Paclitaxel 80(DDP) + Avastin 5mg/kg(3 & 4)				No	10	No	1	Avastin 5mg/kg add in 3rd & 4th cycle of Adjuvent chemo Carbo 5 + T80DDP	Avastin 5mg/kg add in 3rd & 4th cycle of Adjuvent chemo	Carbo 5	T80DDP			Nil	Nil	Nil	Nil	Nil	Nil	Grade1	Nil	Nil	Grade1	Nil	Nil	Nil	Nil	Nil
12	32	1	Ovary	Clear		Yes	62	105	Paclitaxel and Platinum	Paclitaxel			NACT: Carbo 6 + T80(DDP) x 5 then complete OP	T80			Carbo + Lipodox	1	No	2	Avastin 10mg/kg + Carbo 4 + Lipodox 40/Irinotecan 60	Avastin 10mg/kg	/Lipodox 40	/Irinotecan 60			Nil	Nil	Nil	Nil	Nil	Nil	Grade1	Nil	Nil	Grade1	Nil	Nil	Nil	Nil	Nil
13	33	1	Ovary	Mucinous		Yes	4	56	Experimental chemotherapy	Experimental chemotherapy	Experimental chemotherapy		Cisplatin 75 + Cyclophosphamide 750	Carbo + Gemcitabine x2	Irresa + T80; Etoposide		Cisplatin 75 + T175(DDP)x2; Carbo + Lipodox x2; OP; Carbo + Lipodox; IP Cisplatin 50	47	No	4	IP Avastin 2mg/kg x1	IP Avastin 2mg/kg x1					Nil	Nil	Nil	Nil	Nil	Nil	Grade1	Grade1	Nil	Grade1	Nil	Nil	Nil	Nil	Nil
14	62	4	Ovary	Serous	3	Yes	57	111	Paclitaxel and Platinum	Experimental chemotherapy	Paclitaxel	Experimental chemotherapy	Cisplatin 75 + T175	Gemcitabine; Topo + Gemcitabine	T80 + Endoxan 500	Etoposide 50	Carbo 4 + T80 x2; Gemcitabine x3	19	No	3	IP Avastin 5mg/kg	IP Avastin 5mg/kg					Nil	Nil	Nil	Nil	Nil	Nil	Nil	Grade1	Nil	Grade1	Nil	Nil	Nil	Nil	Nil
15	36	4	Ovary	Mucinous	1	Yes	19	64	Experimental chemotherapy	Platinum therapy			Epirubicin 60 + Cisplatin 50 at TSH	IP Cisplatin 60; IP 5-FU 750			Carbo 2 + T80(DDP)	1	Radiotherapy	2	IP Avastin 5mg/kg	IP Avastin 5mg/kg					Nil	Nil	Nil	Nil	Nil	Nil	Nil	Nil	Nil	Grade1	Nil	Nil	Nil	Nil	Nil
16	43	4	Ovary	Clear		Yes	235	272	Paclitaxel and Platinum	Platinum therapy	Paclitaxel	Experimental chemotherapy	Carbo 6 + T80(DDP)	Carbo + Lipodox x2; Carbo + Topox1	Paclitaxel + Lipodox	Gemcitabine + Topo; Gemcitabine + Lipodox	No	1	No	1	IP Avastin 5mg/kg x 3	IP Avastin 5mg/kg x 3					Nil	Nil	Nil	Nil	Nil	Nil	Nil	Nil	Nil	Grade1	Nil	Nil	Nil	Nil	Nil
17	74	3	Ovary	Poorly-differentiated		Yes	7	24	Paclitaxel and Platinum	Paclitaxel			Carbo + Paclitaxel	T80			Carbo + Topo x3; Carbo + Lipodox x1; Carbo + Etoposide x 3; T80	24	No	5	IP Avastin 5mg/kg	IP Avastin 5mg/kg					Nil	Nil	Nil	Grade1	Nil	Nil	Nil	Grade1	Nil	Grade1	Nil	Nil	Nil	Nil	Nil
18	63	4	Ovary	Serous	3	Yes	7	154	Paclitaxel and Platinum	Paclitaxel			Carbo + Paclitaxel	Nab-Paxlitaxel 100			Carbo + Topo x6	14	Radiotherapy	2	Avastin 15 + Lipodox 30 x2; Avastin 15 + Gemcitabine 600 x 2	Avastin 15	Lipodox 30 x2	Gemcitabine 600 x 2			Nil	Nil	Nil	Nil	Nil	Nil	Grade1	Grade1	Nil	Grade1	Nil	Nil	Nil	Nil	Nil
19	59	3	Ovary	Serous	3	None	26	94	Paclitaxel 及 Platinum				Cisplatin 75 + T135 x4 -> Carbo 5 + T135 x 3 -> Carbo 4 + Lipodox x1				Carbo 6 + T80(DDP) x3; Gemcitabine 800 + Lipodox 15 x22	18	No	5	Avastin 5mg/kg + 5-FU 750 x3	Avastin 5mg/kg	5-FU 750 x3				Nil	Nil	Nil	Nil	Nil	Nil	Nil	Nil	Nil	Grade1	Nil	Nil	Nil	Nil	Nil
20	51	2	Ovary	Clear		Yes	40	100	Paclitaxel and Platinum				Carbo 6 + T175				Gemcitabine + Topo; Paclitaxel + Topo; Gemcitabine; Topotecan; Carbo + Etoposide	1	Radiotherapy	4	IP Avastin 5mg/kg	IP Avastin 5mg/kg					Nil	Nil	Nil	Nil	Nil	Nil	Nil	Grade1	Nil	Grade1	Nil	Nil	Nil	Nil	Nil
21	60	3	Ovary	MMMT		None	74	74	Paclitaxel and Platinum				Carbo + Taxel				Unknown	12	Radiotherapy	Unknown	Avastin 15mg/kg + Lipodox 40	Avastin 15mg/kg	Lipodox 40				Nil	Nil	Nil	Nil	Nil	Nil	Grade1	Nil	Nil	Grade1	Nil	Nil	Nil	Nil	Nil
22	57	3	Ovary	Serous	3	Yes	18	18	Paclitaxel and Platinum				Cisplatin 75 + T135				T80+Irresa x4; Carbo + T135; Cisplatin; Carbo + Topo; Carbo + Lipodox; Gemcitabine + Lipodox; Ifosfamide + Etoposide	1	Irresa; Lapatinib; radiotherapy	7	Avastin 5mg/kg + Cyclophosphamide 750	Avastin 5mg/kg	Cyclophosphamide 750				Nil	Nil	Nil	Nil	Nil	Nil	Nil	Grade1	Nil	Grade1	Nil	Nil	Nil	Nil	Nil
23	58	4	Ovary	Serous	3	Yes	39	96	Paclitaxel and Platinum	Experimental chemotherapy	Paclitaxel		Carbo 6 + T80	Carbo + 5-FU x2	T80 x2		Carbo + Lipodox; Cisplatin 40 + T80; IP Cisplatin 60 + IV T80	1	Radiotherapy	3	IP T80 + IV Avastin 5mg/kg x4	IP T80	IV Avastin 5mg/kg x4				Nil	Nil	Nil	Nil	Nil	Nil	Grade1	Grade1	Nil	Grade1	Nil	Grade1	Nil	Nil	Nil
24	44	3	Ovary	Endometrioid		Yes	54	57	Paclitaxel and Platinum				Carbo 5 + T135				Cisplatin 40; Carbo 5 + T175 x5; Doxorubicin + Cyclophosphamide x1	11	Radiotherapy	4	IV Avastin 3mg/kg	IV Avastin 3mg/kg					Nil	Nil	Nil	Nil	Nil	Nil	Nil	Nil	Nil	Grade1	Nil	Nil	Nil	Nil	Nil
25	59	1	Ovary	Clear		None	123	123	Paclitaxel and Platinum				Cisplatin 75 + T135x4 + T135 + Irresa x2				Carbo 5 + IP T25; Carbo 5 + T135 + IP Cisplatin 20; Cisplatin; Etoposide; Paclitaxel	21		3	Avastin 5mg/kg + T50 x4; Avastin 5mg/kg + Carbo 5	Avastin 5mg/kg	T50 x4	Carbo 5			Nil	Nil	Nil	Nil	Nil	Nil	Nil	Nil	Nil	Grade1	Nil	Grade1	Nil	Nil	Nil
26	78	4	Ovary	Serous	3	Yes	20	20	Paclitaxel and Platinum				Cisplatin 75 + T135(NACT);				Carbo 5 + T135 x6; OP; Cisplatin 40 + 5-FU 750 x6	8	Radiotherapy	3	Avastin 5mg/kg + T40	Avastin 5mg/kg	T40				Nil	Nil	Nil	Nil	Nil	Nil	Nil	Grade1	Nil	Grade1	Nil	Nil	Nil	Nil	Nil
27	58	3	Ovary	Serous	3	Yes	46	149	Paclitaxel and Platinum	Experimental chemotherapy	other molecular inhibitor Paclitaxel		Cisplatin 75 + T135	Cyclophosphamide 500 x2	T30 + Irresa x3		Carbo 5 + 5-FU 750 x4; Cisplatin 75 x6; T80 x2; Lipodox 40 x1	9	Radiotherapy	5	Avastin 5mg/kg + Carbo 4 + Lipodox 40 x1; Avastin 5mg/kg x 3	Avastin 5mg/kg	Carbo 4	Lipodox 40 x1			Nil	Nil	Nil	Nil	Nil	Nil	Grade1	Grade1	Nil	Grade1	Nil	Grade1	Nil	Nil	Nil
28	62	3	Ovary	Mixed serous and endometrioid		Yes	144	797	Paclitaxel and Platinum	Avastin Platinum therapy	Avastin Paclitaxel	Experimental chemotherapy	Cisplatin 75 + T135	Avastin 5mg/kg + Carbo 5	Avastin 5mg/kg + T80 x5	Cisplatin 60; Gemcitabine; Cisplatin + 5-FU; Topo	Carbi 5 + T135; Carbo 5 + Lipodox 40; Cisplatin + T135	8	No	4	Avastin 5mg/kg + Cisplatin 60 x2	Avastin 5mg/kg	Cisplatin 60 x2				Nil	Nil	Nil	Nil	Nil	Nil	Grade1	Grade1	Nil	Grade1	Nil	Nil	Nil	Nil	Nil
29	55	3	Ovary	Serous	3	Yes	34	119	Paclitaxel and Platinum	Paclitaxel			Cisplatin + Taxel	T50 + 5-FU			Unkown; IP Cisplatin 40 x6; Carbo + 5-FU x1	6	Radiotherapy	4	IP Cisplatin T75 + IV Avastin 5mg/kg	IV Avastin 5mg/kg	IP Cisplatin T75				Nil	Nil	Nil	Nil	Nil	Nil	Grade1	Nil	Nil	Grade1	Nil	Grade1	Nil	Nil	Nil
30	84	3	Peritoneal			Yes	15	15	Paclitaxel and Platinum				Carbo 6 + T80(DDP) x8 (NACT)				Carbo 4 + Lipodox 40 x10; Carbo + Topo; T50	1	No	4	IV Avastin 5mg/kg	IV Avastin 5mg/kg					Nil	Nil	Nil	Grade1	Nil	Nil	Nil	Grade1	Nil	Grade1	Nil	Grade1	Nil	Nil	Nil
31	56	4	Ovary	MMMT		Yes	13	31	Paclitaxel and Platinum				Cisplatin 75 + T135				Doxorubicin + Ifosfamide; Carbo + T135; Lipodox + Ifosfamide	1	No	4	Avastin 5mg/kg + 5-FU 500 x3	Avastin 5mg/kg	5-FU 500 x3				Nil	Nil	Nil	Grade2	Nil	Nil	Nil	Grade1	Nil	Grade1	Nil	Grade1	Nil	Nil	Nil
32	56	3	Ovary	Endometrioid	3	Yes	424	960	Avastin Paclitaxel and Platinum	LipoDox Platinum therapy	Experimental chemotherapy	othermolecular inhibitor Paclitaxel	Avastin 15mg/kg + Carbo 6 + T175	Carbo + Lipodox; Carbo + Topo; Carbo + 5-FU	Cisplatin 40 + 5-FU; Cisplatin 40 + T80	T80 + Irresa	No	12	No	0	Avastin 15mg/kg + Carbo 6 + T175 for 1st line chemo	Avastin 15mg/kg	Carbo 6	T175 for 1st line chemo			Nil	Nil	Nil	Nil	Nil	Nil	Grade1	Grade1	Nil	Grade1	Nil	Grade1	Nil	Nil	Nil
33	53	4	Ovary	Serous	3	Yes	53	69	Paclitaxel and Platinum	LipoDox			Cisplatin 50 + T100	Lipodox 40			Carbo + Lipodox x1	56	Radiotherapy	2	Avastin 5mg/kg (+ 5-FU 750)	Avastin 5mg/kg	5-FU 750				Nil	Nil	Nil	Nil	Nil	Nil	Grade1	Grade1	Nil	Grade1	Nil	Nil	Nil	Nil	Nil
34	51	3	Ovary	Serous	3	Yes	144	225	Paclitaxel and Platinum	Paclitaxel Platinum therapy			Cisplatin 75 + T135	IP Cisplatin; IP Paclitaxel; IP Carbo			Cisplatin 40 + Lipodox 40	10	No	2	Avastin 5mg/kg + Lipodox 40	Avastin 5mg/kg	Lipodox 40				Nil	Nil	Nil	Nil	Nil	Nil	Grade1	Nil	Nil	Grade1	Nil	Grade1	Nil	Nil	Nil
35	69	3	Ovary	MMMT		Yes	126	180	Paclitaxel and Platinum				Cisplatin 75 + T135				Carbo + Lipodox x1; Carbo + T50	7	Radiotherapy	3	Avastin 5mg/kg (+ Lipodox 40) (+ Gemcitabine) (+5-FU 750) (+ T80)	Avastin 5mg/kg	(+ Lipodox 40)	(+ Gemcitabine)	(+5-FU 750)	(+ T80)	Nil	Nil	Nil	Nil	Nil	Nil	Grade1	Grade1	Nil	Grade1	Nil	Grade1	Nil	Nil	Nil
36	64	3	Ovary	Serous	3	Yes	264	618	Paclitaxel and Platinum	Platinum therapy	Gemcitabine and Platinum	Avastin Gemcitabine and Platinum	Cisplatin 75 + T135	Carbo + 5-FU	Carbo + Gemcitabine	Avastin 5mg/kg + Carbo 4 + Gemcitabine 1000	Lipodox + Gemcitabine; Topo; Carbo + 5-FU	4	No	4	Avastin 5 + Carbo 5 + 5-FU 750	Avastin 5	Carbo 5	5-FU 750			Nil	Nil	Nil	Nil	Nil	Nil	Nil	Nil	Nil	Grade1	Nil	Nil	Nil	Nil	Nil
37	83	3	Peritoneal	Poorly-differentiated		Yes	632	632	Paclitaxel and Platinum				Cisplatin 50 + T80(DDP)				No	27	No	0	Avastin 5mg/kg + T40	Avastin 5mg/kg	T40				Nil	Nil	Nil	Nil	Nil	Nil	Nil	Nil	Nil	Nil	Nil	Nil	Nil	Nil	Nil
38	60	4	Ovary	Serous	3	Yes	22	299	Paclitaxel and Platinum	Experimental chemotherapy	Paclitaxel and Platinum		Cisplatin 75 + T135	Topo	Carbo 5 + T135		Lipodox + Gemcitabine; Cisplatin 40 + T30; Carbo + T175; Carbo + 5-FU	7	Radiotherapy	5	Avastin 5mg/kg + Carbo 4 + 5-FU 750	Avastin 5mg/kg	Carbo 4	5-FU 750			Nil	Nil	Nil	Nil	Nil	Nil	Grade1	Grade1	Nil	Grade1	Nil	Nil	Nil	Nil	Nil
39	55	3	Peritoneal	Poorly-differentiated		Yes	502	502	Avastin Paclitaxel and Platinum				Avastin 200mg; Avastin 200mg + Cisplatin 40 + T135				No	0	No	0	Avastin 200mg; Avastin 200mg + Cisplatin 40 + T135	Avastin 200mg	Cisplatin 40	T135			Nil	Nil	Nil	Nil	Nil	Nil	Grade1	Nil	Nil	Grade1	Nil	Nil	Nil	Nil	Nil
40	56	3	Peritoneal	Serous	3	Yes	138	386	Paclitaxel and Platinum	Experimental chemotherapy	Avastin Paclitaxel Platinum therapy		Cisplatin 75 + T175; Lipodox 40 + T175	IP Paclitaxel + 5-FU;	T100; Carbo 2; Avastin 7.5mg (+ 5-FU) (+ Lipodox 40)		T175 + Lipodox 40; T135 + Topo	5	No	4	Avastin 5mg/kg + T100	Avastin 5mg/kg	T100				Nil	Nil	Nil	Nil	Nil	Nil	Grade1	Grade1	Nil	Grade1	Nil	Nil	Nil	Nil	Nil
41	47	4	Ovary	Poorly-differentiated		Yes	83	83	Platinum therapy	Paclitaxel and Platinum	LipoDox	Experimental chemotherapy	Carbo + 5-FU	Cisplatin 40 + T60(DDP)	Lipodox	Gemcitabine + Docetaxel	No	1	No	1	Avastin 5mg/kg	Avastin 5mg/kg					Nil	Nil	Nil	Nil	Nil	Nil	Nil	Nil	Nil	Grade1	Nil	Grade1	Nil	Nil	Nil
42	53	3	Ovary	Mucinous		Yes	32	362	Paclitaxel and Platinum Avastin	Paclitaxel and Platinum	Experimental chemotherapy Avastin	othermolecular inhibitor LipoDox	Carbo 5 + T135(NACT) (+ Avastin 100mg); Avastin 100mg	IP Cisplatin + Paclitaxel	Oxaliplatin + Capecitabine; Avastin 7.5mg; Carbo + 5-FU; Lipodox + 5-FU	Lipodox + Endoxan	No	1	No	0	NACT with IV Avastin 100mg (+ Carbo 5 + T135)	NACT with IV Avastin 100mg	Carbo 5	T135			Nil	Nil	Nil	Nil	Nil	Nil	Grade1	Nil	Nil	Grade1	Nil	Nil	Nil	Nil	Nil
43	60	3	Ovary	Clear	3	Yes	34	73	Paclitaxel and Platinum	Experimental chemotherapy			Cisplatin 75 + T80(DDP) x1 -> Carbo 5 + T135 x5	Topo 3.0			Lipodox + Gemcitabine x5; Cisplatin 40 + T60(CCRT); Carbo 3 + T135; Carbo 2 + T80(DDP)	8	Radiotherapy	3	Avastin 100mg + Carbo 2 + T80(DDP) x3	Avastin 100mg	Carbo 2	T80(DDP) x3			Nil	Nil	Nil	Nil	Nil	Nil	Grade1	Nil	Nil	Grade1	Nil	Grade1	Nil	Nil	Nil
44	55	3	Ovary	Serous	3	Yes	167	622	Paclitaxel and Platinum	Paclitaxel Experimental chemotherapy	Experimental chemotherapy		Carbo 6 + T80(DDP)	T50 x2; Doxorubicin 40 + Interferon x2	Topo x9; 5-FU 750 x3; MTX 60 x 15		Cisplatin + Paclitaxel for HIPEC	3	No	2	Avastin 7.5 mg/kg + Cyclophosphamide 1PC BID	Avastin 7.5 mg/kg	Cyclophosphamide 1PC BID				Nil	Nil	Nil	Nil	Nil	Nil	Nil	Nil	Nil	Grade1	Nil	Nil	Nil	Nil	Nil
45	46	4	Ovary	Poorly-differentiated		Yes	476	1419	Avastin Paclitaxel and Platinum	Paclitaxel and Platinum	LipoDox Experimental chemotherapy	Experimental chemotherapy Avastin	Avastin 15mg/kg + Carbo 6 + T175 x6 -> Avastin maintain	Carbo 5 + T175 x4;	Lipodox + Gemcitabine x6; Carbo 5 + 5-FU 750 x5; Cisplatin 40 x2; IP T50; Cisplatin 50 x2	Lipodox x1; Gemcitabine x2; Docetaxel 80 x3; Cisplatin + Paclitaxel(HIPEC); Avastin + Gemcitabine	No	13	No	0	Avastin 15mg/kg + Carbo 6 + T175 x6 -> Avastin maintain	Avastin 15mg/kg+Chemo-->Avastin maintain	Carbo 6	T175 x6			Nil	Nil	Nil	Nil	Nil	Nil	Nil	Nil	Nil	Nil	Nil	Nil	Nil	Nil	Nil
46	56	3	Ovary	Serous	3	Yes	197	197	Paclitaxel and Platinum				Cisplatin 75 + T80(DDP) x1				No	1	No	1	Avastin 5mg/kg + Carbo 4 + T80	Avastin 5mg/kg	Carbo 4	T80			Nil	Nil	Nil	Nil	Nil	Nil	Nil	Grade1	Nil	Grade1	Nil	Nil	Nil	Nil	Nil
47	46	4	Ovary	Serous	3	Yes	191	191	Paclitaxel and Platinum				Cisplatin 75 + T175				No	1	No	1	Avastin 7.5mg/kg + Carbo 5 + T175 -> + Lipodox 40 -> + Gemcitabine 800	Avastin 7.5mg/kg	Carbo 5	T175	Lipodox 40	Gemcitabine 800	Nil	Nil	Nil	Nil	Nil	Nil	Grade1	Grade1	Nil	Grade1	Nil	Nil	Nil	Nil	Nil
48	66	3	Ovary	Serous	3	Yes	22	97	Experimental chemotherapy Paclitaxel and Platinum Platinum therapy	LipoDox Experimental chemotherapy	LipoDox Experimental chemotherapy		Cisplatin 75 + Endoxan x3 -> + T135 x1 -> Carbo 4 + T100 x 6; Carbo + Endoxan; Carbo + Lipodox	Lipodox + 5-FU	Lipodox + Gemcitabine		Carbo 6 + T80; Topo; Lipodox	29	Radiotherapy	5	Avastin 5mg/kg + Lipodox 20 + 5-FU 750	Avastin 5mg/kg	Lipodox 20	5-FU 750			Nil	Nil	Nil	Nil	Nil	Nil	Nil	Grade1	Nil	Grade1	Nil	Grade1	Nil	Nil	Nil
49	47	1	Ovary	Clear	3	Yes	126	188	Paclitaxel and Platinum				Carbo 5 + T175				Carbo 5 + T175; Topo	13	No	3	Avastin 7.5mg/kg + Gemcitabine 800 x4 -> + Lipodox 40 x2	Avastin 7.5mg/kg	Gemcitabine 800 x4	Lipodox 40 x2			Nil	Nil	Nil	Nil	Nil	Nil	Grade1	Grade1	Nil	Grade1	Nil	Nil	Nil	Nil	Nil
50	61	2	Ovary	Clear	3	Yes	121	121	Paclitaxel and Platinum				Cisplatin 75 + T135				IP Cisplatin 60; Cisplatin 40 + Gemcitabine 800; Carbo 6 + T80(DDP); Carbo 4 + Lipodox 40; Carbo 4 + Topo; Gemcitabine	16	Radiotherapy	6	Avastin 10 + Gemcitabine 600	Avastin 10	Gemcitabine 600				Nil	Nil	Nil	Nil	Nil	Nil	Grade1	Grade1	Nil	Grade1	Nil	Grade1	Nil	Nil	Nil
51	20	3	Ovary	Yolk sac tumor		None	236	268	Platinum therapy Experimental chemotherapy				Etoposide 100 + Cisplatin 100				Etoposide + Carbo; Ifosfamide + Etoposide + Carbo; Bleomycin + Etoposide + Cisplatin; Gemcitabine + T80; Carbo + T135; Cyclophosphamide; Carbo + T80	4	Radiotherapy	8	Avastin 5mg/kg + Carbo 5 + P80(DDP)	Avastin 5mg/kg	Carbo 5	P80(DDP)			Nil	Nil	Nil	Nil	Nil	Nil	Grade1	Grade1	Nil	Grade1	Nil	Nil	Nil	Nil	Nil
52	42	3	Ovary	Serous	3	None	188	582	Paclitaxel and Platinum	LipoDox Platinum therapy			Cisplatin 75 + T135 -> Carbo 5 + T135	Carbo 4 + Lipodox 35 x8			No	1	No	1	Avastin 15mg/kg + T175 x 12 for maintainence	Avastin 15mg/kg	T175 x 12 for maintainence				Nil	Nil	Nil	Nil	Nil	Nil	Grade1	Nil	Nil	Nil	Nil	Nil	Nil	Nil	Nil
53	47	3	Ovary	Serous	3	None	318	318	Paclitaxel and Platinum				NACT: Cisplatin 75 + T135 x4 -> OP -> Carbo 5 + T135 x6				Carbo 4 + Lipodox 40	6	No	2	Avastin 15mg/kg + Carbo 4 + Lipodox 35 x5	Avastin 15mg/kg	Carbo 4	Lipodox 35 x5			Nil	Nil	Nil	Nil	Nil	Nil	Grade1	Nil	Nil	Grade1	Nil	Grade1	Nil	Nil	Nil
54	26	3	Ovary	Serous	2	Yes	13	126	Paclitaxel and Platinum	Experimental chemotherapy			Cisplatin 75 + T135 -> Carbo 5 + T175	Ifosfamide x2			Carbo 5 + T135 x3	6	No	2	Avastin 5mg/kg + 5-FU 600 x4	Avastin 5mg/kg	5-FU 600 x4				Nil	Nil	Nil	Nil	Nil	Nil	Nil	Nil	Nil	Grade1	Nil	Grade1	Nil	Nil	Nil
55	57	3	Ovary	Serous		None	14	309	Paclitaxel and Platinum	Experimental chemotherapy	Paclitaxel and Platinum	Experimental chemotherapy	Platinum + Taxol in 2000	Topo x2	Cisplatin 30 + T80 x7	Etoposide x1	Salvage chemoRT; Lipodox + Gemcitabine + Platinum; T80 + irresa 2PC; Ifosfamide x2	12	Radiotherapy	4	Avastin 5mg/kg + 5-FU 600 x3	Avastin 5mg/kg	5-FU 600 x3				Nil	Nil	Nil	Nil	Nil	Nil	Nil	Nil	Nil	Grade1	Nil	Nil	Nil	Nil	Nil
56	80	3	Peritoneal	Poorly-differentiated		Yes	66	256	Paclitaxel and Platinum	Paclitaxel and Platinum	Paclitaxel and Platinum		NACT: Cisplatin 75 + T135	IP T80; IP T80 + IV Cisplatin	Cisplatin + Paclitaxel		Carbo 2 + T80(DDP)	1	No	2	Avastin 200mg + T80 x4	Avastin 200mg	T80 x4				Nil	Nil	Nil	Nil	Nil	Nil	Nil	Nil	Nil	Grade1	Nil	Nil	Nil	Nil	Nil
57	60	3	Ovary	Serous	2	Yes	10	113	Paclitaxel and Platinum	Experimental chemotherapy	Paclitaxel and Platinum	Experimental chemotherapy	NACT: Cisplatin 75 + T175 x4 -> OP -> Carbo 5 + T135 x6	IP Etoposide x1	Carbo 5 + T80 x1	IV Etoposide	Carbo 4 + Lipodox 40 x6 -> 2m -> Carbo 6 + T80; IP Cisplatin x2; Carbo 4 + Topo x3; Carbo 4 + Cyclophosphamide; IP Paclitaxel x2; IV Etoposide x1; IP Etoposide x1	11	No	8	Avastin 5mg/kg + Cyclophosphamide x2	Avastin 5mg/kg	Cyclophosphamide x2				Nil	Nil	Nil	Nil	Nil	Nil	Grade1	Grade1	Nil	Grade1	Nil	Grade1	Nil	Nil	Nil
58	46	3	Ovary	Serous	3	Yes	636	1460	Paclitaxel and Platinum Avastin	LipoDox Platinum therapy	Paclitaxel and Platinum other molecular inhibitor	Avastin Experimental chemotherapy	Avastin 7.5mg/kg + Carbo 6 + T175 x6	Carbo 4 + Lipodox 40 x6	Carbo 6 + T80 -> Carbo 2 + T80 + Gefitinib	Avastin 5mg/kg + Gemcitabine + Docetaxel x 10; Cisplatin + Lipodox	No	17	No	0	1st adjuvent: Avastin 7.5mg/kg + Carbo 6 + T175 x6 -> Avastin 7.5mg/kg for maintenence	1st adjuvent: Avastin 7.5mg/kg+Chemo-->Avastin 7.5mg/kg for maintenence	Carbo 6	T175 x6			Nil	Nil	Nil	Nil	Nil	Nil	Grade1	Nil	Nil	Nil	Nil	Grade1	Nil	Nil	Nil
59	53	4	Ovary	Serous	3	Yes	28	209	Paclitaxel and Platinum	Experimental chemotherapy	Avastin Experimental chemotherapy		Carbo 6 + T80(DDP)	Endoxan x2	Avastin 200mg + 5-FU 750 x 3		Carbo 5 + T175 x8; Carbo 5 + T175 x4 -> 6m -> Carbo 5 + T175 x 3; Carbo 5 + T80(DDP) x3; T80 x3	11	Radiotherapy	4	Avastin 100mg x17 + T80 x11 -> Avastin 200mg + 5-FU 750 x3	Avastin 100mg x17	T80 x11	5-FU 750 x3			Nil	Nil	Nil	Nil	Nil	Nil	Grade1	Nil	Nil	Grade1	Nil	Grade1	Nil	Nil	Nil
60	55	3	Ovary	Serous		Yes	153	533	Paclitaxel and Platinum	Experimental chemotherapy	Avastin Experimental chemotherapy othermolecular inhibitor	Experimental chemotherapy Avastin othermolecular inhibitor	Platinum + Paclitaxel at LMD	Carbo + Topo	Avastin + Cyclophosphamide; Carbo + Topo; Irresa + T80	Avastin x2; Theophyllin x1; Topo; Avastin + T40; Cisplatin	Cisplatin + Paclitaxel; Topo; T80 + Irresa; Cisplatin + Topo	6	Radiotherapy	5	Avastin 5mg/kg + Cyclophosphamide 1PC QD x2 -> Avastin + Topo	Avastin 5mg/kg	Cyclophosphamide 1PC QD x2	Topo			Nil	Nil	Nil	Nil	Nil	Nil	Nil	Nil	Nil	Grade1	Nil	Nil	Nil	Nil	Nil
61	58	3	Ovary	Serous	3	Yes	9	209	Paclitaxel and Platinum	Platinum therapy Experimental chemotherapy	Platinum therapy LipoDox Experimental chemotherapy		NACT: Cisplatin 75 + T135 x3 -> OP -> Carbo 5 + T135 x3	Carbo + Topo; Topo	Cisplatin + Lipodox		Carbo 2 + T80(DDP); IP Cisplatin; IV Carbo 6 + Lipodox 20	3	Radiotherapy	4	Avastin 5mg/kg + Cyclophosphamide 1PC QD x2	Avastin 5mg/kg	Cyclophosphamide 1PC QD x2				Nil	Nil	Nil	Nil	Nil	Nil	Nil	Grade1	Nil	Grade1	Nil	Grade1	Nil	Nil	Nil
62	57	3	Ovary	Serous	3	Yes	294	294	Paclitaxel and Platinum				Cisplatin 40 + T80 x 12				Carbo + Gemcitabine -> OP -> Cisplatin + Gemcitabine; Carbo + Topo; Cisplatin + RT; Cisplatin + Irresa	23	Radiotherapy	6	Avastin 300mg + Cyclophosphamide -> + Etoposide x1	Avastin 300mg	Cyclophosphamide	Etoposide x1			Nil	Nil	Nil	Nil	Nil	Nil	Nil	Grade1	Nil	Nil	Nil	Nil	Nil	Nil	Nil
63	91	3	Ovary	Serous	3	None	30	30	Paclitaxel and Platinum				NACT: Cisplatin 20 + T80(DDP) x4 -> Carbo 4 + T80(DDP) x6				OP -> Carbo 2 + T80	2	No	2	Avastin 5mg/kg + Cyclophophamide 1PC QD x2	Avastin 5mg/kg	Cyclophophamide 1PC QD x2				Nil	Nil	Nil	Grade1	Nil	Nil	Nil	Grade1	Nil	Grade1	Nil	Grade1	Nil	Grade1	Nil
64	53	4	Ovary	Poorly-differentiated	3	Yes	199	1541	Paclitaxel and Platinum	Platinum therapy LipoDox Avastin	Experimental biologic Experimental chemotherapy	Experimental chemotherapy othermolecular inhibitor	NACT: Cisplatin 75 + T135 x3 -> OP -> x3	Cisplatin; Avastin 200mg + Lipodox	OP -> Etoposide; Pazopanib; Pazopanib + Cyclophosphamide	OP -> Topo; Gemcitabine; Olaparib	Carbo 2 + T80; Carbo + Paclitaxel; Irresa + Paclitaxel	16	No	4	Avastin 200mg + Cyclophosphamide	Avastin 200mg	Cyclophosphamide				Nil	Nil	Nil	Nil	Nil	Nil	Nil	Nil	Nil	Nil	Nil	Nil	Nil	Nil	Nil
65	72	3	Ovary	Serous	3	Yes	27	209	Paclitaxel and Platinum	LipoDox			NACT: Cisplatin 75 + T135 x2 -> OP -> x4	Lipodox			Carbo 6 + T175 -> 6m -> Carbo 6 + T175; T80 + Gemcitabine; Cisplatin; Topo	6	Radiotherapy	6	Avastin 200mg + Cyclophosphamide -> Avastin 200mg + Etoposide	Avastin 200mg	Cyclophosphamide	Etoposide			Nil	Nil	Nil	Nil	Nil	Nil	Nil	Nil	Nil	Nil	Nil	Nil	Nil	Nil	Nil
66	48	3	Ovary	Poorly-differentiated		Yes	13	180	Paclitaxel . Platinum	Platinum therapy Experimental chemotherapy	Paclitaxel and Platinum		NACT: Carbo 5 + T175 x2 -> OP -> x4	Cisplatin + Cyclophosphamide	Carbo 6 + T80		Cisplatin 50 + Lipodox 20; Weekly T80; Irresa + T80 x2	23	No	4	Avastin 5mg/kg + 5-FU 750 -> + Endoxan -> + Lipodox 10	Avastin 5mg/kg	5-FU 750	Endoxan	Lipodox 10		Nil	Nil	Nil	Nil	Nil	Nil	Grade1	Nil	Nil	Grade1	Nil	Nil	Nil	Nil	Nil
67	76	1	Ovary	Clear	3	Yes	20	85	Paclitaxel and Platinum				Cisplatin + Paclitaxel				Carbo 5 + T75 x8 -> 2m -> Cisplatin 60 + RT -> T80 + RT	96	radiotherapy	4	Avastin 5mg/kg + Endoxan -> T80 -> Avastin 200mg -> Avastin 300mg	Avastin 5mg/kg	Endoxan	T80	Avastin 200mg	Avastin 300mg	Nil	Nil	Nil	Nil	Nil	Nil	Nil	Nil	Nil	Grade1	Nil	Nil	Nil	Grade1	Nil
68	55	3	Ovary	Poorly-differentiated		Yes	2	2	Paclitaxel and Platinum				NACT: Cisplatin 75 + T175 x4 -> OP -> x2				Doxil x6 -> 4m -> Carbo + Placlitaxel x6 -> 6m -> Carbo 6 + T175 x2; Gemcitabine + T175; OP; Gemcitabine + T80(DDP); Irresa + T80	36	Radiotherapy	6	Avastin 2mg/kg x1	Avastin 2mg/kg x1					Nil	Nil	Nil	Grade5	Nil	Nil	Grade1	Grade1	Nil	Grade1	Nil	Nil	Nil	Nil	Nil
69	50	4	Ovary	Poorly-differentiated		Yes	48	118		othermolecular inhibitor			Cisplatin 75 + T135 x6	Pazopanib			T80 + RT; T80 + RT; Topo + RT; Carbo 4 + T80(DDP) x6; Lipodox; Etoposide; Paclitaxel	3	Radiotherapy	7	Avastin 200mg + Paclitaxel x4; Avastin 200mg + Cyclophosphamide x1; Avastin 200mg + Paclitaxel x1	Avastin 200mg	Paclitaxel x4	Cyclophosphamide x1	Paclitaxel x1		Nil	Nil	Nil	Nil	Nil	Nil	Grade1	Nil	Nil	Grade1	Nil	Nil	Nil	Nil	Nil
70	75	3	Ovary	Serous	3	None	605	693	Paclitaxel and Platinum	Platinum therapy			Cisplatin 60 + T110 x7	Cisplatin 30 + RT			Cisplatin 40 + RT; Cyclophosphamide	22	Radiotherapy	3	Avastin 200 + T80 x9	Avastin 200	T80 x9				Nil	Nil	Nil	Nil	Nil	Nil	Nil	Nil	Nil	Nil	Nil	Nil	Nil	Nil	Nil
71	59	3	Ovary	Serous	2	Yes	49	82	Experimental chemotherapy Paclitaxel and Platinum	LipoDox			Cisplatin 75 + T135 x4 -> Cyclophosphamide + T135 -> Cyclopgosphamide + IT x2	Lipodox x2			T80 x3; Topo x2; Paclitaxel x6; Lipodox + Cisplatin; T80 + RT; Lipodox + RT; Cisplatin + RT; Carbo 2 + T80(DDP) x6	8	Radiotherapy	9	Avastin 200 + Endoxan -> Avastin 200mg + Cyclophosphamide	Avastin 200	Endoxan	Cyclophosphamide			Nil	Nil	Nil	Nil	Nil	Nil	Nil	Nil	Nil	Grade1	Nil	Nil	Nil	Nil	Nil
72	47	3	Ovary	Serous	3	None	291	530	Paclitaxel and Platinum	Paclitaxel and Platinum			Cisplatin 75 + T135 x4 -> Carbo 5 + T135 x2	Carbo 5 + T175 x6			Carbo 5 + T175 x6 -> 6m	18	No	2	Avastin 5mg/kg + Carbo 5 + T135 x6	Avastin 5mg/kg	Carbo 5	T135 x6			Nil	Nil	Nil	Nil	Nil	Nil	Grade1	Nil	Nil	Grade1	Nil	Nil	Nil	Nil	Nil
73	64	3	Ovary	Serous	3	Yes	243	243	Paclitaxel and Platinum				Cisplatin 75 + T135 x4 -> Carbo 5 + T135 x2				Carbo 4 + Lipodox 40 x4	4	No	2	Avastin 5mg/kg + Carbo 4 + Lipodox 40 x3 -> Avastin 5mg/kg + Carbo 4 + Topo 0.75 x4	Avastin 5mg/kg	Carbo 4	Lipodox 40 x3	Topo 0.75 x4		Nil	Nil	Nil	Nil	Nil	Nil	Nil	Grade1	Nil	Grade1	Nil	Nil	Nil	Nil	Nil
74	62	4	Ovary	Serous	3	Yes	20	162	Paclitaxel and Platinum	Experimental chemotherapy			Cisplatin 75 + T135 x4 -> Carbo 5 + T135 x2	Topo			Carbo 5 + T175 x6 -> 5m -> Carbo 2 + T80(DDP) x6 -> 7m -> Carbo 2 + T80 x6 -> 5m -> Carbo 4 + Topo 0.75 x6 -> 3m -> Carbo 4 + Topo 0.75 x4 -> Carbo 2 + T80 x6	5	No	7	Avastin 100mg + 5-FU 500mg x3	Avastin 100mg	5-FU 500mg x3				Nil	Nil	Nil	Nil	Nil	Nil	Grade1	Nil	Nil	Grade1	Nil	Grade1	Nil	Nil	Nil
75	58	3	Ovary	Serous	3	None	98	98	Paclitaxel and Platinum				Cisplatin 75 + T135 x4 -> Carbo 5 + T135 x2				Carbo 6 + T175 x6 -> 30m -> Now	36	Radiotherapy	2	Avastin 10mg/kg + Carbo 6 x4	Avastin 10mg/kg	Carbo 6 x4				Nil	Nil	Nil	Nil	Nil	Nil	Grade1	Nil	Nil	Grade1	Nil	Nil	Nil	Nil	Nil
76	59	3	Ovary	Serous	3	None	166	193	Paclitaxel and Platinum	other molecular inhibitor			LSC-> NACT: Carbo 5 + T175 x3 -> OP -> x6	Radiotherapy			Carbo 6 + T175 x6 -> 2m -> Carbo 6 + T175 x6 -> 7m -> Now	9	No	3	Avastin 10mg/kg + Carbo 6 + T175 x2	Avastin 10mg/kg	Carbo 6	T175 x2			Nil	Nil	Nil	Nil	Nil	Nil	Grade1	Grade1	Grade1	Grade1	Nil	Nil	Nil	Nil	Nil
77	49	3	Ovary	Endometrioid	3	None	286	286	Paclitaxel and Platinum				Mass OP -> NACT: Carbo 6 + T175 x6 -> 2nd debulk -> x6				Cisplatin + Paclitaxel for HIPEC	8	No	2	Avastin 10mg/kg + Carbo 6 + T175 x6	Avastin 10mg/kg	Carbo 6	T175 x6			Nil	Nil	Nil	Nil	Nil	Nil	Nil	Grade1	Nil	Grade1	Nil	Nil	Nil	Nil	Nil
78	50	4	Ovary	Serous	3	Yes	21	45		LipoDox Platinum therapy			OP & Carbo 6 + T175 x1 at TMUH -> x4	Carbo 4 + Lipodox 40 x1			No	1	No	1	Avastin 10mg/kg + Carbo 6 + T175 x1	Avastin 10mg/kg	Carbo 6	T175 x1			Nil	Nil	Nil	Nil	Nil	Nil	Nil	Nil	Nil	Grade1	Grade1	Grade1	Nil	Grade1	Nil
68	54	3	Ovary	Endometrioid	3	Yes	78	167	Paclitaxel and Platinum				NACT: Carbo 6 + T175 x6 -> OP -> x6				No	3	No	1	Avastin 10mg/kg + Carbo 5 + Lipodox 40 x4	Avastin 10mg/kg	Carbo 5	Lipodox 40 x4			Nil	Nil	Nil	Nil	Nil	Nil	Grade1	Grade1	Nil	Grade1	Nil	Nil	Nil	Nil	Nil
80	64	3	Ovary	Serous	3	Yes	208	208					NACT: Avastin 10mg/kg + Carbo 6 + T175 x6 -> OP -> Carbo 6 + T175				No	0	No	0	NACT: Avastin 10mg/kg + Carbo 6 + T175 x6	NACT: Avastin 10mg/kg	Carbo 6	T175 x6			Nil	Nil	Nil	Nil	Nil	Nil	Grade1	Grade1	Nil	Grade1	Nil	Nil	Nil	Nil	Nil
81	59	4	Ovary	Serous	3	Yes	34	68	Paclitaxel and Platinum	Paclitaxel	Experimental chemotherapy Paclitaxel		Cisplatin 75 + T80(DDP)-> Carbo 5 + Cyclophosphamide	T80	Endoxan; Paclitaxel; immunotherapy		Carbo + Lipodox x1; Topo x2; T80 + Cyclophosphamide x4; Carbo + Etoposide x3; Carbo + Gemcitabine x2; Carbo + Lipodox x1	1	No	8	Avastin 5mg/kg + 5-FU 750 x1 -> OP hyperthermia	Avastin 5mg/kg	5-FU 750 x1				Nil	Nil	Nil	Nil	Nil	Nil	Nil	Nil	Nil	Grade1	Nil	Nil	Nil	Nil	Nil
82	64	3	Ovary	Mixed serous and endometrioid	3	Yes	587	665		other molecular inhibitor Experimental chemotherapy	Experimental chemotherapy	othermolecular inhibitor	OP and 1st chemo Cisplatin + Paxlitaxel at CMUH	5-FU + T80 + Sunitinib + Gefitinib x4	Gemcitabine + Lipodox x2; Paclitaxel x3; Lipodox x2; T80 x1	Immunotherapy	Cisplatin + Paclitaxel x6; Carbo + Paclitaxel + immunotherapy; Carbo 3 + T80; Topo x2	24	Radiotherapy	5	Avastin 5mg/kg + 5-FU 750 x2 -> Avastin 100mg + Cyclophosphamide x2 -> Avastin 100 + Carbo + T80 x2-> Avastin 100 + 5-FU 1000 x4	Avastin 5mg/kg	5-FU 750 x2	Cyclophosphamide x2	Carbo	T80 x2	Nil	Nil	Nil	Nil	Nil	Nil	Grade1	Grade1	Nil	Grade1	Nil	Grade1	Nil	Nil	Nil
83	73	4	Ovary	Serous	3	Yes	16	33	Paclitaxel and Platinum	Paclitaxel			Cisplatin 75 + T135	Paclitaxel; Immunotherapy			Gemcitabine; IP Paclitaxel; IV Paclitaxel x2; Immunotherapy	12	No	4	IP Avastin 5mg/kg x1	IP Avastin 5mg/kg x1					Nil	Nil	Nil	Nil	Nil	Nil	Nil	Nil	Nil	Grade1	Nil	Nil	Nil	Nil	Nil
84	77	3	Ovary	Serous	3	Yes	21	163	Paclitaxel and Platinum	Paclitaxel Paclitaxel and Platinum	other molecular inhibitor		Ciaplatin 75 + T135 x4 -> Carbo 5 + T135 x2	Paclitaxel 60; Carbo 2 + Paclitaxel 60 x 2	Immunotherapy		Carbo + Lipodox x1; Lipodox x4; Topo x2; Carbo 6 + T80 x1; Lipodox + Gemcitabine x2; Topo x2	1	Hyperthemia	6	Avastin 5mg/kg ＋ 5-FU 750 x1	Avastin 5mg/kg	5-FU 750 x1				Nil	Nil	Nil	Nil	Nil	Nil	Grade1	Grade1	Nil	Grade1	Nil	Nil	Nil	Nil	Nil
85	58	4	Tube	Serous	3	Yes	40	53		Experimental chemotherapy LipoDox Paclitaxel	other molecular inhibitor		NACT: Cisplatin 75 + T135 x4 -> OP -> Carbo 5 + T135 x4	Lipodox + Taxel x1; Cyclophosphamide x1	Immunotherapy		Carbo 5 + Lipodox x4; Lipodox x2; Cisplatin + Doxorubicin for HIPEC; Paclitaxel x2	4	for HIPEC	5	Avastin 100mg x3	Avastin 100mg x3					Nil	Nil	Nil	Nil	Nil	Nil	Nil	Grade1	Nil	Grade1	Nil	Grade1	Nil	Nil	Nil
86	68	3	Ovary	Transitional cell tumor	3	Yes	27	27	Paclitaxel and Platinum	Paclitaxel			Cisplatin 75 + T135 4 -> Carbo 5 + T135 x2	Paclitaxel 30mg			Carbo + Lipodox x6; Carbo + Etoposide x3; Paclitaxel + Irresa x2; Carbo + Cyclophosphamide	1	Radiotherapy	5	Avastin 5mg/kg + Endoxan	Avastin 5mg/kg	Endoxan				Nil	Nil	Nil	Grade1	Nil	Nil	Grade1	Grade1	Nil	Grade1	Nil	Grade1	Nil	Nil	Nil
87	47	4	Ovary	Serous	3	Yes	44	322	Paclitaxel and Platinum	Paclitaxel and Platinum	Experimental chemotherapy		Carbo 6 + T80(DDP) x6	Carbo 6 + T80(DDP) x2	Gemcitabine x2; Topo		Lipodox x3; Paclitaxel x1	11	Radiotherapy	3	Avastin 5mg/kg -> Avastin 5mg/kg + T80	Avastin 5mg/kg	T80				Nil	Nil	Nil	Nil	Nil	Nil	Nil	Nil	Nil	Grade1	Nil	Nil	Nil	Nil	Nil
88	60	3	Tube	Serous	3	None	294	294	Paclitaxel and Platinum Experimental chemotherapy	Experimental chemotherapy	Experimental chemotherapy	othermolecular inhibitor	Cisplatin 75 + Cyclophosphoamide x1 -> Cisplatin 75 + T80 -> Topo x2	Carbo + Etoposide; Paclitaxel x3	Paclitaxel + Epirubicin x1; Carbo + Paclitaxel x2	Immunotherapy	Carbo + Etoposide x4 -> 3m -> T80 -> 10m -> T80 x2; Carbo + Lipodox; Gemcitabine -> 2y -> Paclitaxel; Cisplatin	22	Radiotherapy and immunotherapy	8	Avastin 100mg x2 -> Chemo - > Avastin 100mg + 5-FU 750 x 3	Avastin 100mg x2	5-FU 750 x 3				Nil	Nil	Nil	Nil	Nil	Nil	Grade1	Grade1	Nil	Grade1	Nil	Grade1	Nil	Nil	Nil
89	56	1	Ovary	Clear	3	Yes	122	148		Paclitaxel	Paclitaxel and Platinum		LSC part-> Carbo 6 + Endoxan -> Carbo 6 + T175 x 5	Paclitaxel for HIPEC	Taxol and Cisplatin for CCRT		Carbo 6 + T80(DDP) x2; IP T80 x1	9	No	4	Avastin 15mg/kg + Carbo 6 + T80(DDP) x2	Avastin 15mg/kg	Carbo 6	T80(DDP) x2			Nil	Nil	Nil	Nil	Nil	Nil	Grade1	Grade1	Nil	Grade1	Nil	Nil	Nil	Nil	Nil
